# Supplementary material
Source: PubMed Central journal article supplement (PMC4151504)
Supplement: NIHMS616881-supplement-supplement_1.pdf [file NIHMS616881-supplement-supplement_1.pdf]

**Supplemental Material**

**Supplemental Table 1.** Independent predictors of baseline anemia.

| <b>Variable</b>                           | <b>Odds Ratio</b> | <b>95% CI</b> | <b>P-Value</b> |
|-------------------------------------------|-------------------|---------------|----------------|
| Age                                       | 1.03              | 1.02-1.04     | <.001          |
| Coronary Artery Disease                   | 0.75              | 0.57-0.99     | .04            |
| Previous Myocardial Infarction            | 1.33              | 1.06-1.69     | .02            |
| Previous Coronary Bypass                  | 1.71              | 1.35-2.17     | <.001          |
| SBP, mmHg                                 | 1.01              | 1.00-1.02     | .007           |
| DBP, mmHg                                 | 0.97              | 0.96-0.98     | <.001          |
| JVD ≥10cm                                 | 1.34              | 1.10-1.62     | .004           |
| White Blood Cell Count, x 10 <sup>9</sup> | 0.89              | 0.85-0.92     | <.001          |
| Serum BUN, mg/dL                          | 2.09              | 1.55-2.81     | <.001          |
| BNP, pg/mL                                | 1.22              | 1.02-1.46     | 0.032          |
| Albumin, g/dL                             | 0.30              | 0.25-0.37     | <.001          |
| Aldosterone-Blocking Agents               | 0.82              | 0.68-0.99     | .034           |
| Digoxin                                   | 0.83              | 0.69-1.00     | 0.049          |
| Clopidogrel                               | 1.62              | 1.16-2.28     | .005           |

Abbreviations: SBP=systolic blood pressure, DBP=diastolic blood pressure, JVD=jugular venous distension, BUN=blood urea nitrogen, BNP=brain natriuretic peptide.

**Supplemental Table 2.** Association between natriuretic peptide level and odds of baseline anemia.

| <b>Natriuretic Peptide</b> | <b>Odds Ratio of anemia for...</b>      | <b>OR</b> | <b>95 % CI</b> | <b>P-value</b> |
|----------------------------|-----------------------------------------|-----------|----------------|----------------|
| NT-proBNP                  | 1 log-unit increase in NT-proBNP        | 1.47      | 1.37-1.58      | <.001          |
| BNP                        | 1 log-unit increase in BNP              | 1.59      | 1.39-1.82      | <.001          |
| NT-proBNP or BNP           | 1 log-unit increase in NT-proBNP or BNP | 1.50      | 1.40-1.60      | <.001          |

Abbreviation: BNP=brain natriuretic peptide, OR=Odds Ratio, CI=confidence interval.

**Supplemental Table 3.** Characteristics of patients based on discharge anemia status.

| Variable                                 | No Anemia at any point<br>(N=2166) | Persistent Anemia<br>(N=851) | Developed Anemia<br>(N=128) | Resolved Anemia<br>(N=308) |
|------------------------------------------|------------------------------------|------------------------------|-----------------------------|----------------------------|
| <b>Baseline Status</b>                   |                                    |                              |                             |                            |
| Hemoglobin, g/dL                         | 14.5 (13.7, 15.4)                  | 11.3 (10.4, 11.9)            | 13.2 (13.0, 13.8)           | 12.2 (11.7, 12.7)          |
| Weight, kg                               | 81 (71, 96)                        | 80 (70, 94)                  | 80 (67, 91)                 | 80 (70, 91)                |
| JVD ≥10cm                                | 25%                                | 31%                          | 25%                         | 35%                        |
| log(BNP)                                 | 6.3 (5.4, 7.1)                     | 6.9 (6.2, 7.6)               | 6.9 (5.9, 7.7)              | 6.7 (5.8, 7.3)             |
| <b>Change from Baseline to Discharge</b> |                                    |                              |                             |                            |
| Hemoglobin, g/dL                         | 0.4 (-0.3, 1.0)                    | 0.1 (-0.3, 0.6)              | -0.9 (-1.4, -0.6)           | 1.4 (0.9, 1.9)             |
| Weight, kg                               | -2.5 (-4.6, -1.1)                  | -2.4 (-4.7, -0.9)            | -1.4 (-3.0, -0.3)           | -3.6 (-6.1, -1.8)          |
| log(BNP)                                 | 0.3 (-0.8, 0.1)                    | 0.2 (-0.6, 0.1)              | -0.2 (-0.6, 0.3)            | -0.4 (-0.8, -0.1)          |

Abbreviations: JVD=jugular venous distension, BNP=brain natriuretic peptide.

**Supplemental Table 4.** Association between baseline hemoglobin as a continuous variable and adjusted outcomes.

| <b>Endpoint</b>                                | <b>Hazard Ratio represents...</b> | <b>Adjusted* Hazard Ratio</b> | <b>95% Confidence Interval</b> | <b>P-Value</b> |
|------------------------------------------------|-----------------------------------|-------------------------------|--------------------------------|----------------|
| All-cause mortality                            | 1 g/dL increase in hemoglobin     | 0.97                          | 0.93-1.00                      | 0.053          |
| Cardiovascular Mortality or HF Hospitalization |                                   |                               |                                |                |
| ≤100 days                                      | 1 g/dL increase in hemoglobin     | 0.92                          | 0.89-0.96                      | <0.001         |
| >100 days                                      | hemoglobin                        | 0.99                          | 0.95-1.03                      | 0.52           |

\*Adjusted for randomization group, age, sex, region, NYHA class, atrial fibrillation, ejection fraction, systolic blood pressure, serum sodium, BUN, natriuretic-peptide level, QRS duration, use of an ACE-inhibitor/ARB, beta-blocker, aldosterone blocker, digoxin, intravenous inotrope, diabetes, hypertension, CAD, COPD, ischemic HF etiology, previous HF hospitalizations, and renal insufficiency.
